# Supplementary material
Source: MDPI journal article supplement (https://www.mdpi.com/2073-4441/12/12/3530)
Supplement: s1 [file s1]

Table S1. List of Indicators and Methods Used for Freshwater and Marine Protected Areas

| Indicator Category | Unique # | Indicator Name                        | Measurement                                                                                         | Examples of Sampling Methodology(s)                 | Citation(s) for Freshwater | Citation(s) for Marine |
|--------------------|----------|---------------------------------------|-----------------------------------------------------------------------------------------------------|-----------------------------------------------------|----------------------------|------------------------|
| Biophysical        | 1        | Area showing signs of recovery        | Estimated frequency of recovery milestones met                                                      | No examples explicitly examined this.               |                            |                        |
| Biophysical        | 1        | Area showing signs of recovery        | Estimated proportion of recovery within focal species populations against target                    | No examples explicitly examined this.               |                            |                        |
| Biophysical        | 1        | Area showing signs of recovery        | Number of fish species that are "direct beneficiaries"                                              | focus group interviews with stakeholders            | Baird and Flaherty 2005    |                        |
| Biophysical        | 1        | Area showing signs of recovery        | Percent of project area restored (as a % change in structure/biomass/density/abundance/total cover) | <b>HABITAT:</b> aerial photos                       | Robinson et al. 2011       |                        |
| Biophysical        | 2        | Area under no or reduced human impact | Number of fishers or fishing boats (quantitative)                                                   | structured interviews or focus groups; observations |                            |                        |
| Biophysical        | 2        | Area under no or reduced human impact | Presence and level of human activities (qualitative)                                                | key informant interviews                            |                            |                        |

Table S1. List of Indicators and Methods Used for Freshwater and Marine Protected Areas

|             |   |                                            |                                                                                                                                                                                                                                                                                                            |                                                                                                                                                                                                                                                           |                                                                                                                                                                                                                                                                                                    |                                                                                                                                                                                                                                                                                                                 |
|-------------|---|--------------------------------------------|------------------------------------------------------------------------------------------------------------------------------------------------------------------------------------------------------------------------------------------------------------------------------------------------------------|-----------------------------------------------------------------------------------------------------------------------------------------------------------------------------------------------------------------------------------------------------------|----------------------------------------------------------------------------------------------------------------------------------------------------------------------------------------------------------------------------------------------------------------------------------------------------|-----------------------------------------------------------------------------------------------------------------------------------------------------------------------------------------------------------------------------------------------------------------------------------------------------------------|
| Biophysical | 3 | Composition and structure of the community | Diversity (alpha = mean species richness inside/outside of protected area; beta = relationship between average local species richness (a) and the total number of species (S); the relationships between maximum local species richness and the total number of species in the data set; Sorensen's index; | <b>FISH:</b> underwater visual census; standard gill net surveys; market and creel surveys; <b>INVERTS:</b> kick-net sampling for macroinvertebrates; 50x50 cm quadrates for macrophyte, hand net sampling; Surber Sampler for benthic macroinvertebrates | Paz et al. 2008 (Shannon-Wiener Index); Heino et al. 2009 (various); Casado et al. 2011 (Shannon-Wiener, using Log2); Sweke et al. 2013 (Shannon-Wiener Diversity Index; H'); Sarkar et al. 2013 (Shannon Diversity Index; H', Jaccard's index of similarity; J'); Guareschi et al. 2015 (various) | Dufour et al. 1995 (Shannon-Weaver Diversity Index; H'); Camargo et al. 2009 (Shannon Diversity Index; H', Jaccard's index of similarity; J'); Tkachenko et al. 2010 (Shannon-Weaver Diversity Index; H'); Soykan and Lewison 2015 (metadata analysis; Shannon diversity, Simpson diversity, Zipf-Mandelbrot b) |
| Biophysical | 3 | Composition and structure of the community | Dominance                                                                                                                                                                                                                                                                                                  |                                                                                                                                                                                                                                                           |                                                                                                                                                                                                                                                                                                    | Camargo et al. 2009; Soykan and Lewison 2015 (metadata analysis; relative, McNaughton, Zipf-Mandelbrot c)                                                                                                                                                                                                       |
| Biophysical | 3 | Composition and structure of the community | Evenness                                                                                                                                                                                                                                                                                                   | <b>INVERTEBRATES:</b> Surber Sampler for benthic macroinvertebrates                                                                                                                                                                                       | Paz et al. 2008 (Pielou's index)                                                                                                                                                                                                                                                                   | Soykan and Lewison 2015 (metadata analysis, Gambin alpha, eCDF slope, eCDF inflection, y shape, Shannon evenness)                                                                                                                                                                                               |
| Biophysical | 3 | Composition and structure of the community | Multivariate statistics: (PERMANOVA+); detrended Canonical Correspondence Analysis; PCA                                                                                                                                                                                                                    | <b>FISH:</b> bamboo traps; standard gill net surveys; underwater visual census                                                                                                                                                                            | Sanyanga et al. 1995; Silvano et al. 2009; Srinoparatwatana and Hyndes 2011                                                                                                                                                                                                                        | Dufour et al. 1995; Tkachenko et al. 2010                                                                                                                                                                                                                                                                       |

Table S1. List of Indicators and Methods Used for Freshwater and Marine Protected Areas

|             |   |                                            |                       |                                                                                                                                                                                                                                                                                                                                                                    |                                                                                                                                                                                                                                          |                                                                                                                                                                                                                                                                                                                                   |
|-------------|---|--------------------------------------------|-----------------------|--------------------------------------------------------------------------------------------------------------------------------------------------------------------------------------------------------------------------------------------------------------------------------------------------------------------------------------------------------------------|------------------------------------------------------------------------------------------------------------------------------------------------------------------------------------------------------------------------------------------|-----------------------------------------------------------------------------------------------------------------------------------------------------------------------------------------------------------------------------------------------------------------------------------------------------------------------------------|
| Biophysical | 3 | Composition and structure of the community | Rarity                | <b>FISH:</b> Point Abundance Sampling electrofishing method                                                                                                                                                                                                                                                                                                        | Chantepie et al. 2011                                                                                                                                                                                                                    | Soykan and Lewison 2015 (metadata analysis, log skew, percentage rare N/S)                                                                                                                                                                                                                                                        |
| Biophysical | 3 | Composition and structure of the community | Species richness (S') | <b>FISH:</b> underwater visual census; Point Abundance Sampling electrofishing method; modified lift net (in a wetland); bamboo traps; standard gill net surveys; market and creel surveys;<br><b>INVERTEBRATES:</b> hand net sampling; kick-net sampling for macroinvertebrates; 50x50 cm quadrates for macrophyte; Surber Sampler for benthic macroinvertebrates | Paz et al. 2008; Heino et al. 2009; Casado et al. 2011; Chantepie et al. 2011 (not assessing FPA, just developing indicators); Srinoparatwatana and Hyndes 2011; Chessman 2013; Sarkar et al. 2013; Sweke et al. 2013; Penha et al. 2014 | Halpern 2003 and Lester et al. 2009 (for metadata analyses); Camargo et al. 2009 (but only for three families of fish); Dufour et al. 1995; Tkachenko et al. 2010 (also used Margalef's species richness index), Soykan and Lewison 2015 (metadata analysis, number of species sampled, Margalef diversity, log series $\alpha$ ) |

Table S1. List of Indicators and Methods Used for Freshwater and Marine Protected Areas

|             |   |                                            |                                                    |                                                                                                                                    |                                                                                                                                                                                                                                                                                                                                                                                                           |                                                                                                                                                  |
|-------------|---|--------------------------------------------|----------------------------------------------------|------------------------------------------------------------------------------------------------------------------------------------|-----------------------------------------------------------------------------------------------------------------------------------------------------------------------------------------------------------------------------------------------------------------------------------------------------------------------------------------------------------------------------------------------------------|--------------------------------------------------------------------------------------------------------------------------------------------------|
| Biophysical | 3 | Composition and structure of the community | Various existing diversity and composition indices | <b>FISH:</b> Point Abundance Sampling electrofishing method<br><b>INVERTEBRATES:</b> Surber Sampler for benthic macroinvertebrates | Paz et al. 2008 (Biological Monitoring Working Party scoring system, Average Score Per Taxon (ASPT) score, % EPT (Ephemeroptera, Plecoptera and Trichoptera), %EPT richness); Casado et al. 2011 (Biological Monitoring Working Party scoring system); Chantepeie et al. 2011 (Origin Index; biodiversity conservation concern index (BCC) following Fattorini (2005); aggregative conservation index (Q) |                                                                                                                                                  |
| Biophysical | 4 | Focal species abundance                    | Focal species abundance                            | <b>FISH:</b> underwater visual census; Point Abundance Sampling electrofishing method; bamboo traps; standardized gill net surveys | Sanyanga et al. 1995; Cucherousset et al. 2007; Silvano et al. 2009; Srinoparatwatana and Hyndes 2011; Sarkar et al. 2013; Sweke et al. 2013                                                                                                                                                                                                                                                              | Halpern 2003 (for metadata analyses); Camargo et al. 2009; Lester et al. 2009 (for metadata analyses); Garces et al. 2012; Da Silva et al. 2015. |
| Biophysical | 4 | Focal species abundance                    | Focal species density                              | <b>FISH:</b> underwater visual census; modified lift net (in a wetland)                                                            | Paz et al. 2008 (looked at density of plants); Penha et al. 2014                                                                                                                                                                                                                                                                                                                                          | Dufour et al. 1995; Halpern 2003 and Lester et al. 2009 (for metadata analyses); Tkachenko et al. 2010; Anderson et al. 2014                     |

Table S1. List of Indicators and Methods Used for Freshwater and Marine Protected Areas

|             |   |                                          |                                                                                                                 |                                                                                                                 |                                                                                  |                                                                                                                                                 |
|-------------|---|------------------------------------------|-----------------------------------------------------------------------------------------------------------------|-----------------------------------------------------------------------------------------------------------------|----------------------------------------------------------------------------------|-------------------------------------------------------------------------------------------------------------------------------------------------|
| Biophysical | 4 | Focal species abundance                  | Focal species biomass                                                                                           | <b>FISH:</b> underwater visual census (L-to-W to estimate biomass); bamboo traps; standardized gill net surveys | Silvano et al. 2009; Srinoparatwatana and Hyndes 2011                            | Halpern 2003 and Lester et al. 2009 (for metadata analyses); Dalton et al. 2012; Garces et al. 2012; Anderson et al. 2014; Da Silva et al. 2015 |
| Biophysical | 5 | Focal species population structure       | Mean size of individuals                                                                                        | <b>FISH:</b> standard gill net surveys; underwater visual census                                                | Sanyanga et al. 1995; Sarkar et al. 2013                                         | Halpern 2003; Lester et al. 2009 (for metadata analyses); Dalton et al. 2012                                                                    |
| Biophysical | 5 | Focal species population structure       | Proportion of fish categorized as large                                                                         | <b>FISH:</b> underwater visual surveys                                                                          |                                                                                  | Dufour et al. 1995                                                                                                                              |
| Biophysical | 5 | Focal species population structure       | Size structure                                                                                                  | <b>FISH:</b> underwater visual surveys; fyke nets trapping, eel pots; bamboo traps; standard gill net surveys   | Sanyanga et al. 1995; Cucherousset et al. 2007; Srinoparatwatana and Hyndes 2011 | Dufour et al. 1995; Camargo et al. 2009; Tkachenko et al. 2010; Garces et al. 2012 (no measurement or method described)                         |
| Biophysical | 6 | Food web integrity                       | Characterization of the trophic roles and predator prey relationships (qualitative); measure of predation rates |                                                                                                                 |                                                                                  | Muthiga 2009; Garces et al. 2012 (no measurement or method described)                                                                           |
| Biophysical | 7 | Habitat distribution and complexity      | Habitat composition                                                                                             | underwater visual line transects or quadrats                                                                    | Sweke et al. 2013                                                                | Tkachenko et al. 2010; Garces et al. 2012; Da Silva et al. 2015                                                                                 |
| Biophysical | 7 | Habitat distribution and complexity      | Habitat distribution                                                                                            | underwater visual line transects                                                                                | Sweke et al. 2013                                                                | Garces et al. 2012                                                                                                                              |
| Biophysical | 8 | Presence or absence of a species         | Presence of alien invasive species                                                                              | Key informant interviews, literature reviews                                                                    | Rodriguez-Rodriguez et al. 2013                                                  |                                                                                                                                                 |
| Biophysical | 9 | Recruitment success within the community | Recruitment success                                                                                             | light traps, collection plates                                                                                  |                                                                                  | Garces et al. 2012                                                                                                                              |

Table S1. List of Indicators and Methods Used for Freshwater and Marine Protected Areas

|             |    |                                          |                                        |                                                                                                                                                                                                                                             |                                                                          |                                                                                                                                                                                                                                                         |
|-------------|----|------------------------------------------|----------------------------------------|---------------------------------------------------------------------------------------------------------------------------------------------------------------------------------------------------------------------------------------------|--------------------------------------------------------------------------|---------------------------------------------------------------------------------------------------------------------------------------------------------------------------------------------------------------------------------------------------------|
| Biophysical | 10 | Total abundance by taxa                  | Total abundance                        | <b>FISH:</b> underwater visual census; gill nets and seine nets<br><b>INVERTEBRATES:</b> hand net sampling                                                                                                                                  | Silvano et al. 2009; Casado et al. 2011; Chessman 2013                   | Dufour et al. 1995; Halpern 2003 and Lester et al. 2009 (for metadata analyses); Garces et al. 2012; Soykan and Lewison 2015 (metadata analysis, total abundance, y scale, log normal $\mu$ , log normal $\sigma$ , log series c); Da Silva et al. 2015 |
| Biophysical | 10 | Total abundance by taxa                  | Total biomass                          | <b>FISH:</b> modified lift net (in a wetland), underwater visual census; bamboo trap, gill nets and seine nets                                                                                                                              | Silvano et al. 2009; Srinoparatwatana and Hyndes 2011; Penha et al. 2014 | Halpern 2003 and Lester et al. 2009 (for metadata analyses); Garces et al. 2012; Soykan and Lewison 2015 (metadata analysis); Da Silva et al. 2015                                                                                                      |
| Biophysical | 10 | Total abundance by taxa                  | Total density                          | <b>FISH:</b> modified lift net (in a wetland); bamboo trap<br><b>INVERTEBRATES:</b> Surber Sampler for benthic                                                                                                                              | Paz et al. 2008; Srinoparatwatana and Hyndes 2011; Penha et al. 2014     |                                                                                                                                                                                                                                                         |
| Biophysical | 11 | Type, level and return on fishing effort | Harvest CPUE outside of protected area | <b>FISH:</b> # of fish per hour per ha, based on fishing licenses and anonymous questionnaires; household survey and key informant interviews (can also be done with logbook, creel surveys or observers); mean catch per trip by gear type | Cucherousset et al. 2007                                                 | Garces et al. 2012; Tupper et al. 2015                                                                                                                                                                                                                  |

Table S1. List of Indicators and Methods Used for Freshwater and Marine Protected Areas

|               |    |                                                                            |                                                                                                                                                  |                                                                                                                                      |                                                                                                                                    |                                                                                                                         |
|---------------|----|----------------------------------------------------------------------------|--------------------------------------------------------------------------------------------------------------------------------------------------|--------------------------------------------------------------------------------------------------------------------------------------|------------------------------------------------------------------------------------------------------------------------------------|-------------------------------------------------------------------------------------------------------------------------|
| Biophysical   | 12 | Water quality                                                              | Temperature, conductivity, pH, dissolved oxygen, turbidity/transparency, other standard analyses                                                 | literature review, mutliparameter meter; monitoring data                                                                             | Paz et al. 2008; Silvano et al. 2009; Robinson et al. 2011; Rodriguez-Rodriguez et al. 2013; Sarkar et al. 2013; Sweke et al. 2013 |                                                                                                                         |
| Socioeconomic | 13 | Changes in conditions of ancestral and historical sites/features/monuments | Location, condition, accessibility, and folklore associated with ancestral and historical sites/features/monuments in or near the protected area | Key informant interviews; mapping; photographic documentation                                                                        |                                                                                                                                    | Garces et al. 2012                                                                                                      |
| Socioeconomic | 14 | Community infrastructure and business                                      | Level of community services and infrastructure; number of type of commercial businesses, esp. those associated with the protected area           | Interviews and key informant surveys; infrastructure/business checklist; review of secondary documents                               | Vermeersch 2014                                                                                                                    | Gjertsen 2005; Muthiga 2009                                                                                             |
| Socioeconomic | 15 | Distribution of formal knowledge to community                              | Ranking the level of awareness about information generated by scientific community on protected area use and ecosystem impacts                   | Interviews and household surveys (economic experimental game); review of secondary documents                                         |                                                                                                                                    | Camargo et al. 2009; Muthiga 2009; Garces et al. 2012                                                                   |
| Socioeconomic | 16 | Household income distribution by source                                    | Sources of livelihood/income and their relative importance                                                                                       | Interviews and household surveys (participatory rural diagnostic, income profile, economic experimental game), ladder scale diagrams |                                                                                                                                    | Camargo et al. 2009; Maliao et al. 2009; Pajaro et al. 2010; Garces et al. 2012; Tupper et al. 2015; Weigel et al. 2015 |

Table S1. List of Indicators and Methods Used for Freshwater and Marine Protected Areas

|               |    |                                                      |                                                                                                                                                                                                          |                                                                                                                                                                                                                                       |                 |                                                                                                                                  |
|---------------|----|------------------------------------------------------|----------------------------------------------------------------------------------------------------------------------------------------------------------------------------------------------------------|---------------------------------------------------------------------------------------------------------------------------------------------------------------------------------------------------------------------------------------|-----------------|----------------------------------------------------------------------------------------------------------------------------------|
| Socioeconomic | 17 | Household occupational structure                     | List of household members and occupations; Ranking of primary, secondary, and tertiary occupations; Distribution of occupation and sources of income across households and social groups (ages, genders) | Interviews and household surveys (participatory rural diagnostic, income profile, economic experimental game)                                                                                                                         | Vermeersch 2014 | Camargo et al. 2009                                                                                                              |
| Socioeconomic | 18 | Level of understanding of human impacts on resources | Anecdotes, stories, observations of apparent causes and effects, opinions of how to use natural environment, ranking of threats in terms of impact                                                       | Interviews and focal group surveys (participatory rural diagnostic, problems and opportunities matrix, economic experimental game); maps and transects; decision trees, Venn Diagrams, flow charts                                    |                 | Camargo et al. 2009; Garces et al. 2012; Marques et al. 2013; Velez 2014                                                         |
| Socioeconomic | 19 | Local aquatic resource use patterns                  | Characteristics of aquatic activities (equipment, methods, organization), resource users (gender, residency status, age); timing, location, and trends of activities                                     | Interviews and focal group surveys (participatory rural diagnostic, productive profile); direct observations; maps of activity locations and use rights; timelines of event occurrence and seasonality; review of secondary documents | Baird 2006      | Camargo et al. 2009; Pajaro et al. 2010; Garces et al. 2012; Muthiga 2009; Hamilton 2012; Tupper et al. 2015; Weigel et al. 2015 |



Table S1. List of Indicators and Methods Used for Freshwater and Marine Protected Areas

|               |    |                                                         |                                                                                                                                                         |                                                                                                                                   |                         |                                                                                     |
|---------------|----|---------------------------------------------------------|---------------------------------------------------------------------------------------------------------------------------------------------------------|-----------------------------------------------------------------------------------------------------------------------------------|-------------------------|-------------------------------------------------------------------------------------|
| Socioeconomic | 20 | Local values and beliefs about aquatic resources        | Percentage of agreement with value statements; level of agreement with value statements; collection of motivations, beliefs, anecdotes                  | Interviews and household surveys (economic experimental game, social cartography)                                                 | Vermeersch 2014         | Camargo et al. 2009; Marques et al. 2013; Velez 2014                                |
| Socioeconomic | 21 | Wealth/Material style of life                           | Assessment of assets associated with wealth and poverty                                                                                                 | Interviews and household surveys                                                                                                  |                         | Pajaro et al. 2010                                                                  |
| Socioeconomic | 22 | Number and nature of markets                            | 10 most important vertebrate, invertebrate, and plant products; time, location, importance, and purpose of harvest; location of sales; degree of demand | Interviews and key informant surveys (participatory rural diagnostic, productive profile), map of market flow or product movement | Vermeersch 2014         | Camargo et al. 2009; Garces et al. 2012; Tupper et al. 2015                         |
| Socioeconomic | 23 | Percentage of stakeholder group in leadership positions | Number of individual stakeholders from various groups who have been or are currently in a leadership position related to protected area management      | Key informant interviews, review organizational structure of APA management; experimental economic game                           |                         | Camargo et al. 2009                                                                 |
| Socioeconomic | 24 | Perception of benefits derived from the APA             | Agreement with statement that the APA has provided benefits; Description of ecological or social benefits that the APA has provided                     | Interviews and surveys with key informants                                                                                        | Baird and Flaherty 2005 | Dalton et al. 2012; Warner and Pomeroy 2012; Hamilton 2012; Bennet and Dearden 2014 |

Table S1. List of Indicators and Methods Used for Freshwater and Marine Protected Areas

|               |    |                                                        |                                                                                                                                                                                                 |                                                                                                                                                                           |                 |                                                                                                                                                                                        |
|---------------|----|--------------------------------------------------------|-------------------------------------------------------------------------------------------------------------------------------------------------------------------------------------------------|---------------------------------------------------------------------------------------------------------------------------------------------------------------------------|-----------------|----------------------------------------------------------------------------------------------------------------------------------------------------------------------------------------|
| Socioeconomic | 25 | Perceptions of fish or other aquatic food availability | Number of days reported of insufficient food in past month; number of days reported of insufficient seafood/aquatic food in past month; opinions of protected area effects on food availability | Interviews and surveys with household food purchasers/preparers, participatory rural diagnostic, seasonal analysis                                                        |                 | Camargo et al. 2009; Pajaro et al. 2010                                                                                                                                                |
| Socioeconomic | 26 | Perceptions of local resource harvest or abundance     | Perceptions of: species caught; amount of fish caught; changes in focal species abundance today and before protected area                                                                       | Interviews and surveys with fishers (participatory rural diagnostic, productive profile, social cartography, seasonal analysis, submarine profile); ladder scale diagrams | Vermeersch 2014 | Gjertsen 2005; Camargo et al. 2009; Maliao et al. 2009; Pajaro et al. 2010; Dalton et al. 2012; Garces et al. 2012; Hamilton 2012; Marques et al. 2013; Velez 2014; Tupper et al. 2015 |
| Socioeconomic | 27 | Perceptions of non-market and non-use values           | Level of agreement with value statements related to non-market and non-use values (existence value, option value, bequest value)                                                                | Interviews and household surveys (economic valuation); economic experimental game                                                                                         |                 | Camargo et al. 2009; Garces et al. 2012; Tupper et al. 2015                                                                                                                            |
| Socioeconomic | 28 | Quality of human health or well-being                  | Perception of well-being; infant mortality rate; availability of health services; child weight, occurrence of major diseases; prevalence of vaccinations                                        | Interviews and surveys with key informants; review of secondary sources (health department data)                                                                          |                 | Gjertsen 2005                                                                                                                                                                          |

Table S1. List of Indicators and Methods Used for Freshwater and Marine Protected Areas

|               |    |                                                             |                                                                                                                                                                                                                                                                                                                                  |                                                                                                      |                                                                                                                                                                                                  |                                                                                                                                                                                |
|---------------|----|-------------------------------------------------------------|----------------------------------------------------------------------------------------------------------------------------------------------------------------------------------------------------------------------------------------------------------------------------------------------------------------------------------|------------------------------------------------------------------------------------------------------|--------------------------------------------------------------------------------------------------------------------------------------------------------------------------------------------------|--------------------------------------------------------------------------------------------------------------------------------------------------------------------------------|
| Socioeconomic | 29 | Stakeholder knowledge of natural history                    | Observations, experiences, beliefs, and perceptions of cause and effect; degree to which local knowledge is passed to generations; local names for resources, places, and activities; knowledge of resource location, mobility, population size, interactions, behaviors; APA manager awareness and use of stakeholder knowledge | Interviews and focal group surveys/discussions (participatory rural diagnostic, historical analysis) | Baird and Flaherty 2005; Baird 2006 (indicator: perceptions of fish increases; fish surfacing in deep water pools, or croaking noises of fish; monitor algae grazing marks of algae eating fish) | Camargo et al. 2009                                                                                                                                                            |
| Governance    | 30 | Availability and allocation of APA administrative resources | Human, financial, and equipment resources available to administer APA activities (number of staff, training, and experience, budget, equipment inventory), review of record keeping procedures                                                                                                                                   | Key informant interviews; mapping; photographic documentation; review of secondary documents         | Vermeersch 2014                                                                                                                                                                                  | Francis et al. 2002; Beger et al. 2005; Gjertsen 2005; Camargo et al. 2009; Garces et al. 2012; Muthiga 2009; Warner and Pomeroy 2012; Horigue et al. 2014; Tupper et al. 2015 |

Table S1. List of Indicators and Methods Used for Freshwater and Marine Protected Areas

|            |    |                                          |                                                                                                                                                                                                                                 |                                                                    |                 |                                                                                                                         |
|------------|----|------------------------------------------|---------------------------------------------------------------------------------------------------------------------------------------------------------------------------------------------------------------------------------|--------------------------------------------------------------------|-----------------|-------------------------------------------------------------------------------------------------------------------------|
| Governance | 31 | Clearly defined enforcement procedures   | Existence and descriptions of guidelines and procedures for protected area enforcement; number of reported violations; number of successful or attempted prosecutions; accessibility and availability of enforcement guidelines | Key informant interviews/surveys; review of secondary documents    | Vermeersch 2014 | Beger et al. 2005; Camargo et al. 2009; Muthiga 2009; Garces et al. 2012; Rossiter and Levine 2013; Horigue et al. 2014 |
| Governance | 32 | Community control over coastal resources | Community perception of ability to monitor and regulate internal use patterns of coastal resources                                                                                                                              | ladder scale diagram                                               |                 | Maliao et al. 2009                                                                                                      |
| Governance | 33 | Community influence over management      | Community perception of influence and bargaining power over decision making and management                                                                                                                                      | ladder scale diagram                                               |                 | Maliao et al. 2009                                                                                                      |
| Governance | 34 | Compliance with fisheries rules          | Perceived conformity of behaviors of local resource users to prescribed rules; Instances of poaching                                                                                                                            | ladder scale diagram, direct observation, key informant interviews | Vermeersch 2014 | Francis et al. 2002; Guidetti et al. 2008; Maliao et al. 2009; Warner and Pomeroy 2012; Rossiter and Levine 2013        |

Table S1. List of Indicators and Methods Used for Freshwater and Marine Protected Areas

|            |    |                                                           |                                                                                                                                               |                                                                                         |                 |                                                                                                                                                                    |
|------------|----|-----------------------------------------------------------|-----------------------------------------------------------------------------------------------------------------------------------------------|-----------------------------------------------------------------------------------------|-----------------|--------------------------------------------------------------------------------------------------------------------------------------------------------------------|
| Governance | 35 | Degree of interaction between managers and stakeholders   | Number of regularly scheduled meetings between protected area managers/staff and stakeholders                                                 | Key informant interviews/surveys; supporting document review                            | Vermeersch 2014 | Camargo et al. 2009; Garces et al. 2012; Marques et al. 2013; Horigue et al. 2014; Velez et al. 2014; Tupper et al. 2015                                           |
| Governance | 36 | Enforcement coverage                                      | Number of patrols undertaken for a given time period and area; number and type of infractions per patrol                                      | Key informant interviews/surveys; supporting document review                            |                 | Guidetti et al. 2008; Camargo et al. 2009; Pajaro et al. 2010; Warner and Pomeroy 2012; Marques et al. 2013; Horigue et al. 2014                                   |
| Governance | 37 | Equitable distribution of APA effects                     | Perceptions of equitable distribution of APA benefits/impacts                                                                                 | Key informant interviews/surveys                                                        |                 | Dalton et al. 2012; Rossiter and Levine 2013                                                                                                                       |
| Governance | 38 | Existence and adoption of a management plan               | Existence of a document with protected area goals and objectives, institutional structure of management, and portfolio of management measures | Key informant interviews/surveys; management plan checklist; economic experimental game | Vermeersch 2014 | Francis et al. 2002; Beger et al. 2005; Camargo et al. 2009; Pajaro et al. 2010; Garces et al. 2012; Marques et al. 2013; Horigue et al. 2014; Tupper et al. 2015; |
| Governance | 39 | Existence of a decision-making and management body        | Identification of management plan; location of decision making body; identification of APA staff; dates and location of meetings              | Key informant interviews/surveys; organizational chart construction                     | Vermeersch 2014 | Francis et al. 2002; Beger et al. 2005; Camargo et al. 2009; Garces et al. 2012; Horigue et al. 2014; Tupper et al. 2015                                           |
| Governance | 40 | Existence and activity level of community organization(s) | Existence and characterization of community organizations                                                                                     | Key informant interviews/surveys                                                        |                 | Beger et al. 2005; Camargo et al. 2009; Pajaro et al. 2010; Warner and Pomeroy 2012; Marques et al. 2013                                                           |

Table S1. List of Indicators and Methods Used for Freshwater and Marine Protected Areas

|            |    |                                                            |                                                                                                                                              |                                                              |                                                  |                                                                                                                                                    |
|------------|----|------------------------------------------------------------|----------------------------------------------------------------------------------------------------------------------------------------------|--------------------------------------------------------------|--------------------------------------------------|----------------------------------------------------------------------------------------------------------------------------------------------------|
| Governance | 41 | Existence and adequacy of enabling legislation             | Assessment of laws and institutions associated with natural resource management and protected areas                                          | Key informant interviews/surveys; legal analysis             | Moller and Munoz-Pedrerros 2014; Vermeersch 2014 | Camargo et al. 2009; Garces et al. 2012; Warner and Pomeroy 2012; Tupper et al. 2015                                                               |
| Governance | 42 | Existence and application of scientific research and input | Presence and characterization of scientific studies; review and accessibility of study outputs                                               | Key informant interviews/surveys; literature review          |                                                  | Beger et al. 2005; Camargo et al. 2009                                                                                                             |
| Governance | 43 | Fair allocation of access rights                           | Perceived fairness of allocation of rights to enter and withdraw resources                                                                   | ladder scale diagram                                         |                                                  | Maliao et al. 2009                                                                                                                                 |
| Governance | 44 | Information dissemination                                  | Number and effectiveness of capacity-building efforts for stakeholders on benefits, rules, regulations and enforcement of the protected area | Key informant interviews/surveys; supporting document review | Vermeersch 2014                                  | Camargo et al. 2009; Garces et al. 2012; Warner and Pomeroy 2012; Marques et al. 2013                                                              |
| Governance | 45 | Level of resource conflict                                 | Issues, stakeholders, time period, intensity, and scale, and resolution of conflicts associated with the protected area                      | Key informant interviews/surveys; ladder scale diagram       |                                                  | Camargo et al. 2009; Maliao et al. 2009; Dalton et al. 2012; Garces et al. 2012; Marques et al. 2013; Rossiter and Levine 2013; Tupper et al. 2015 |

Table S1. List of Indicators and Methods Used for Freshwater and Marine Protected Areas

|            |    |                                                                              |                                                                                                                                                        |                                                                                                                         |                 |                                                                                                                                                                                                                                      |
|------------|----|------------------------------------------------------------------------------|--------------------------------------------------------------------------------------------------------------------------------------------------------|-------------------------------------------------------------------------------------------------------------------------|-----------------|--------------------------------------------------------------------------------------------------------------------------------------------------------------------------------------------------------------------------------------|
| Governance | 46 | Level of stakeholder involvement in surveillance, monitoring and enforcement | Number of stakeholders who participated in patrolling or other surveillance and monitoring activities; description of patrol activities and procedures | Key informant interviews/surveys; supporting document review                                                            |                 | Francis et al. 2002; Beger et al. 2005; Camargo et al. 2009; Velez et al. 2014                                                                                                                                                       |
| Governance | 47 | Level of stakeholder participation & satisfaction in management              | Amount of stakeholder active involvement in APA decisions and activities; satisfaction with participation                                              | Key informant interviews/surveys; stakeholder analysis matrix, ladder scale diagram; Index of individual perception     | Vermeersch 2014 | Francis et al. 2002; Beger et al. 2005; Camargo et al. 2009; Maliao et al. 2009; Muthiga 2009; Moreno-Sanchez and Maldonado 2010; Pajaro et al. 2010; Dalton et al. 2012; Hamilton 2012; Rossiter and Levine 2013; Velez et al. 2014 |
| Governance | 48 | Level of training provided to stakeholders in participation                  | Amount and effectiveness of capacity-building efforts to empower stakeholder participation; budget allocated for capacity building                     | Key informant interviews/surveys; supporting document review; observe participation in meetings; focal group discussion | Vermeersch 2014 | Beger et al. 2005; Camargo et al. 2009; Marques et al. 2013                                                                                                                                                                          |
| Governance | 49 | Local understanding of APA rules and regulations                             | Level of awareness and understanding of protected area rules and regulations                                                                           | Key informant interviews/surveys; experimental economic game                                                            | Vermeersch 2014 | Camargo et al. 2009; Moreno-Sanchez and Maldonado 2009; Pajaro et al. 2010; Garces et al. 2012; Velez et al. 2014; Tupper et al. 2015;                                                                                               |

Table S1. List of Indicators and Methods Used for Freshwater and Marine Protected Areas

|            |    |                                                       |                                                                                                             |                                                              |  |                                        |
|------------|----|-------------------------------------------------------|-------------------------------------------------------------------------------------------------------------|--------------------------------------------------------------|--|----------------------------------------|
| Governance | 50 | Perception of APA performance                         | Whether people agree the APA is successful or effective                                                     | Key informant interviews/surveys                             |  | Dalton et al. 2012                     |
| Governance | 51 | Proportion of stakeholders trained in sustainable use | Number of stakeholders who participated in training and who have knowledge about sustainable resources uses | Key informant interviews/surveys; supporting document review |  | Beger et al. 2005; Camargo et al. 2009 |
